# Supplementary material for: Accumulation of the RNA polymerase subunit RpoB depends on RNA editing by OsPPR16 and affects chloroplast development during early leaf development in rice
Source: PubMed Central journal article supplement (PMC7689822; doi:10.1111/nph.16769), 2020-07-22
Supplement: NPH-228-1401-s001.pdf [file NPH-228-1401-s001.pdf]

## **New Phytologist Supporting Information Figs S1–S8, Tables S1–S3, and Methods S1**

Article title: Accumulation of the RNA polymerase subunit RpoB depends on RNA editing by OsPPR16 and affects chloroplast development during early leaf development in rice

Authors: Weifeng Huang, Yang Zhang, Liqiang Shen, Qian Fang, Qun Liu, Chenbo Gong, Chen Zhang, Yong Zhou, Cui Mao, Yongli Zhu, Jinghong Zhang, Hongping Chen, Yu Zhang, Yongjun Lin, Ralph Bock, Fei Zhou

Article acceptance date: 11 June 2020

The following Supporting Information is available for this article:

**Fig. S1** Phenotype of rice (*Oryza sativa*) *osppr16* mutant and WT plants at the tillering stage.

**Fig. S2** Alignment of the amino acid sequences of OsPPR16 and its closest homologues from *Arabidopsis thaliana* (NP\_172596.1, CRR22), *Nicotiana tabacum* (XP\_016505961.1), and *Zea mays* (NP\_001356569.1).

**Fig. S3** Phylogenetic analysis of OsPPR16 and the nucleotide positions corresponding to the editing sites *rpoB*-545, *ndhB*-746, and *ndhD*-887 in 79 land plants.

**Fig. S4** Editing efficiency of 24 plastid RNA editing sites in rice (*Oryza sativa*) WT and *osppr16* mutant plants.

**Fig. S5** Splicing analyses of rice chloroplast transcripts in rice (*Oryza sativa*) WT and *osppr16d* mutant plants at the three-leaf stage.

**Fig. S6** Expression of *trnN* and *rpl23* in rice (*Oryza sativa*) WT and *osppr16* mutant plants.

**Fig. S7** *osppr16* mutants show a gun phenotype on Norflurazon.

**Fig. S8** Tissue-specific expression profiles of *OsPPR16* in rice (*Oryza sativa*) plants.

**Table S1** List of oligonucleotides used in this study.

**Table S2** Accession numbers of RpoB, NdhB, NdhD, and homologous of OsPPR16 in 79 land plants.

**Table S3** Genotype and phenotype of T<sub>0</sub> transgenic plants.

**Methods S1** Complementation of the *osppr16* mutant.

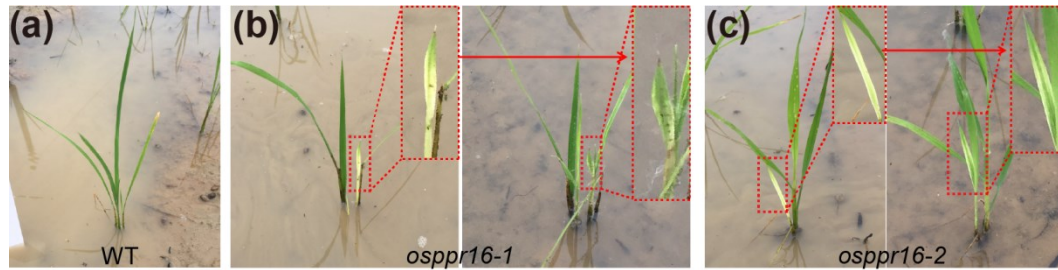

**Fig. S1** Phenotype of rice (*Oryza sativa*) *osppr16* mutant and WT plants at the tillering stage. (a) WT plant. (b) *osppr16* mutant plant obtained with Strategy I. (c) *osppr16* mutant generated by Strategy II (cf. Fig. 1).

OsPPR16  
 CRR22  
 XP\_016505961.1  
 NP\_001356569.1

1 10 20 30 40 50 60  
 MSSQLVQFSTV PQLPNPPSRHRHFLSERNYLPANVYEHPA ALLLERCSLSKELRQLFLV  
 SFP LLASSTLPP PLPAAIIPGQPPSLAQR HLPSSHLYKTP ALLLEBLCSLSKELRQLFLV

OsPPR16  
 CRR22  
 XP\_016505961.1  
 NP\_001356569.1

70 80 90 100 110 120  
 MVICSVAAATASLLPSPPKPTALAADDHARLRAAAARSDDIPAAALAAFY  
 KNGLYQEH FQTKLVSLCFRYGSVDEARVFEPI DSKLNVL -MTMLKGFARVSDIDDKALQFVF  
 KNGLYNEH FETKLISLETKYGSLNDATKVFDFAKLKDPM -MTMLKAHTRQSTVSSISFYS  
 MLC CRATASLSPSPPPSHAADP HARLRAAAARVDEP GAAALAAFY

OsPPR16  
 CRR22  
 XP\_016505961.1  
 NP\_001356569.1

130 140 150 160 170 180 190  
 AMS-----SAGAPPVLRRT FESLKLCAARGD ATGRAVHAQLAAARGIDSEALAAAT ALANMYAK  
 RMR-----YDDVEPVVYNE FYLKLVCGDEAE EVGKEHLG LLVKSGFSLDLFANT GLENMYAK  
 RLR-----YD NVTPVIYNFGY LKACADTSDV LKQVHAQLLHG FSDNLFA NTSIVNLYAK  
 SMSSPSSAAHAAGPVLRRT FATLKLCAARRD ATGRAVHAQLEARGLA SESA ATALANMYAK

OsPPR16  
 CRR22  
 XP\_016505961.1  
 NP\_001356569.1

200 210 220 230 240 250  
 CRRPADARVFDMPV RDRVAWNA LVAGYARNGLARM AMBMVVRMQE BEG- FREDSITLVSVLP  
 CRQVNEARVFDMP ERDLVSWNT IVAGYQNGMARM ALEMVKS MCEEN - LKPSFITLVSVLP  
 CGMVGDA CKMFDRMPD RDLVSWNT IVAGYQNGM SKRALGLV LRMH - BEGC HRPSITLVSVLP  
 CRRPADARVFDMP SRRVAWNA VVAGYARNGLPS SAMEA AVVRMQE BEGC HRPSITLVSVLP

OsPPR16  
 CRR22  
 XP\_016505961.1  
 NP\_001356569.1

260 270 280 290 300 310 320  
 ACANARALAA CEAHAF AIRSG E ELVNYA FALD AYCKGG DRA ARV VFD DP T KNSV SWN AM  
 AVSALRL TSVG REHG YAM RSGS DSV NST AFVD MYAK GSSE TAR QLF DP GLE RNV SWN AM  
 ICAG IGS LRMG SIHG YVY RNG ESLV NST AFVD MYAK GSSE TAR QLF DP GLE RNV SWN AM  
 ACA DARA LA CERE VHA FALR AG DEL VN NST AFVD MYAK GSSE TAR QLF DP GLE RNV SWN AM

OsPPR16  
 CRR22  
 XP\_016505961.1  
 NP\_001356569.1

330 340 350 360 370 380  
 LDG YA QNG DSE ALAL ENRV BEGD VTD VSV LA AL QACG E LG LDEG MRV HE EL LYR IGL DSN V  
 LD YA QNG DSE ALAL ENRV BEGD VTD VSV LA AL QACG E LG LDEG MRV HE EL LYR IGL DSN V  
 LD YA QNG DSE ALAL ENRV BEGD VTD VSV LA AL QACG E LG LDEG MRV HE EL LYR IGL DSN V  
 LD YA QNG DSE ALAL ENRV BEGD VTD VSV LA AL QACG E LG LDEG MRV HE EL LYR IGL DSN V

OsPPR16  
 CRR22  
 XP\_016505961.1  
 NP\_001356569.1

390 400 410 420 430 440  
 SVM NAL IT MYSK CKRV DL ASV HD EL- DR RT QSV NAM IG CANG CSE DAV RL TRM QLE NV R  
 SVM NSL IS MYCK CKRV DL ASV HD EL- DR RT QSV NAM IG CANG CSE DAV RL TRM QLE NV R  
 AV NSL IS MYCK CKRV DL ASV HD EL- DR RT QSV NAM IG CANG CSE DAV RL TRM QLE NV R  
 SVM NAL IT MYSK CKRV DL ASV HD EL- DR RT QSV NAM IG CANG CSE DAV RL TRM QLE NV R

OsPPR16  
 CRR22  
 XP\_016505961.1  
 NP\_001356569.1

450 460 470 480 490 500 510  
 PDS FTL VSV I AL AD IS DP LQ AR W I H G YS IR LH D Q D V Y V I TA L D M Y A K C G R V N I A R L I F N S A  
 PDS FTL VSV I AL AD IS DP LQ AR W I H G YS IR LH D Q D V Y V I TA L D M Y A K C G R V N I A R L I F N S A  
 PDS FTL VSV I AL AD IS DP LQ AR W I H G YS IR LH D Q D V Y V I TA L D M Y A K C G R V N I A R L I F N S A  
 PDS FTL VSV I AL AD IS DP LQ AR W I H G YS IR LH D Q D V Y V I TA L D M Y A K C G R V N I A R L I F N S A

OsPPR16  
 CRR22  
 XP\_016505961.1  
 NP\_001356569.1

520 530 540 550 560 570  
 RER H V I T W N A I H G Y S H G F G A A V E L F E E M K S I G I V P N E T T F L S V L S A C S H A G L V D E G R E Y T  
 SER H V I T W N A I H G Y S H G F G A A V E L F E E M K S I G I V P N E T T F L S V L S A C S H A G L V D E G R E Y T  
 DDR H V I T W N A I H G Y S H G F G A A V E L F E E M K S I G I V P N E T T F L S V L S A C S H A G L V D E G R E Y T  
 DRH V I T W N A I H G Y S H G F G A A V E L F E E M K S I G I V P N E T T F L S V L A A C S H A G L V D E G Q K Y F A

OsPPR16  
 CRR22  
 XP\_016505961.1  
 NP\_001356569.1

580 590 600 610 620 630 640  
 S M K E D Y G L E P G M E H Y G T M V D L L G R A G K L D E A W S P T K N M P T P G L S V Y G A M L G A C K L H K N V E L A E  
 M K E N Y S T E S V D H Y G A M V D L L G R A G R L N E A W S P T K N M P T P G L S V Y G A M L G A C K L H K N V N F A E  
 I M R E E Y S L E P S V D H Y G A M V D L L G R A G Q L D E A W S P T K N M P T P G L S V Y G A M L G A C K L H R N V E L A E  
 S M K K D Y G L E P S V D H Y G A M V D L L G R A G K L D E A W S P T K N M P T P G L S V Y G A M L G A C K L H K N V E L A E

OsPPR16  
 CRR22  
 XP\_016505961.1  
 NP\_001356569.1

650 660 670 680 690 700  
 E S A Q K I F E L G Q E G V Y H V L A N I A N A S M K D V A R V R T A M E K N G L Q K T P G S I L Q L K N E H T F Y  
 K A A E R L F E L D D D G Y H V L A N I A A S M K D V A R V R T A M E K N G L Q K T P G S I L Q L K N E V H S F P  
 K A A D K L F E L D D D G Y H V L A N I A A S M K D V A R V R T A M E K N G L Q K T P G S I L Q L K N E V H S F P  
 E S A Q I L F E L G H E G V Y H V L A N I A A S M K D V A R V R T A M E K N G L Q K T P G S I L Q L K N E V H S F P

OsPPR16  
 CRR22  
 XP\_016505961.1  
 NP\_001356569.1

710 720 730 740 750 760  
 S G S T N H Q A K E L Y S R L A K L E E I K A V G Y P D T S I H D V E D D V R A Q L L N T H S E K L A A F G L L R T A  
 S G S T N H Q A K E L Y S R L A K L E E I K A V G Y P D T S I H D V E D D V R A Q L L N T H S E K L A A F G L L R T A  
 S G S T N H Q A K E L Y S R L A K L E E I K A V G Y P D T S I H D V E D D V R A Q L L N T H S E K L A A F G L L R T A  
 S G S T N H Q A K E L Y S R L A K L E E I K M G Y P D T S I H D V E D D V R A Q L L N T H S E R L A A F Y G L L R T A

OsPPR16  
 CRR22  
 XP\_016505961.1  
 NP\_001356569.1

770 780 790 800 810 822  
 P G T T I I K K N L R V C N D C H N A T K I S L V T G R E L M R D I Q R F H H F K D G K C S C G D Y W  
 A G T T I H R K N L R V C A D C H N A T K I S L V T G R E L V R D M Q R F H H F K N G A C S C G D Y W  
 A G T T I H R K N L R V C A D C H S A T K I S L V M K R E L V R D M H R F H H F K D G A C S C G D Y W  
 P G T T I I K K N L R V C N D C H N A T K I S L I T G R E L M R D I Q R F H H F K D G K C S C G D Y W

**Fig. S2** Alignment of the amino acid sequences of OsPPR16 and its closest homologues from *Arabidopsis thaliana* (NP\_172596.1, CRR22), *Nicotiana tabacum* (XP\_016505961.1), and *Zea mays* (NP\_001356569.1). The DYW domain is underlined in red.

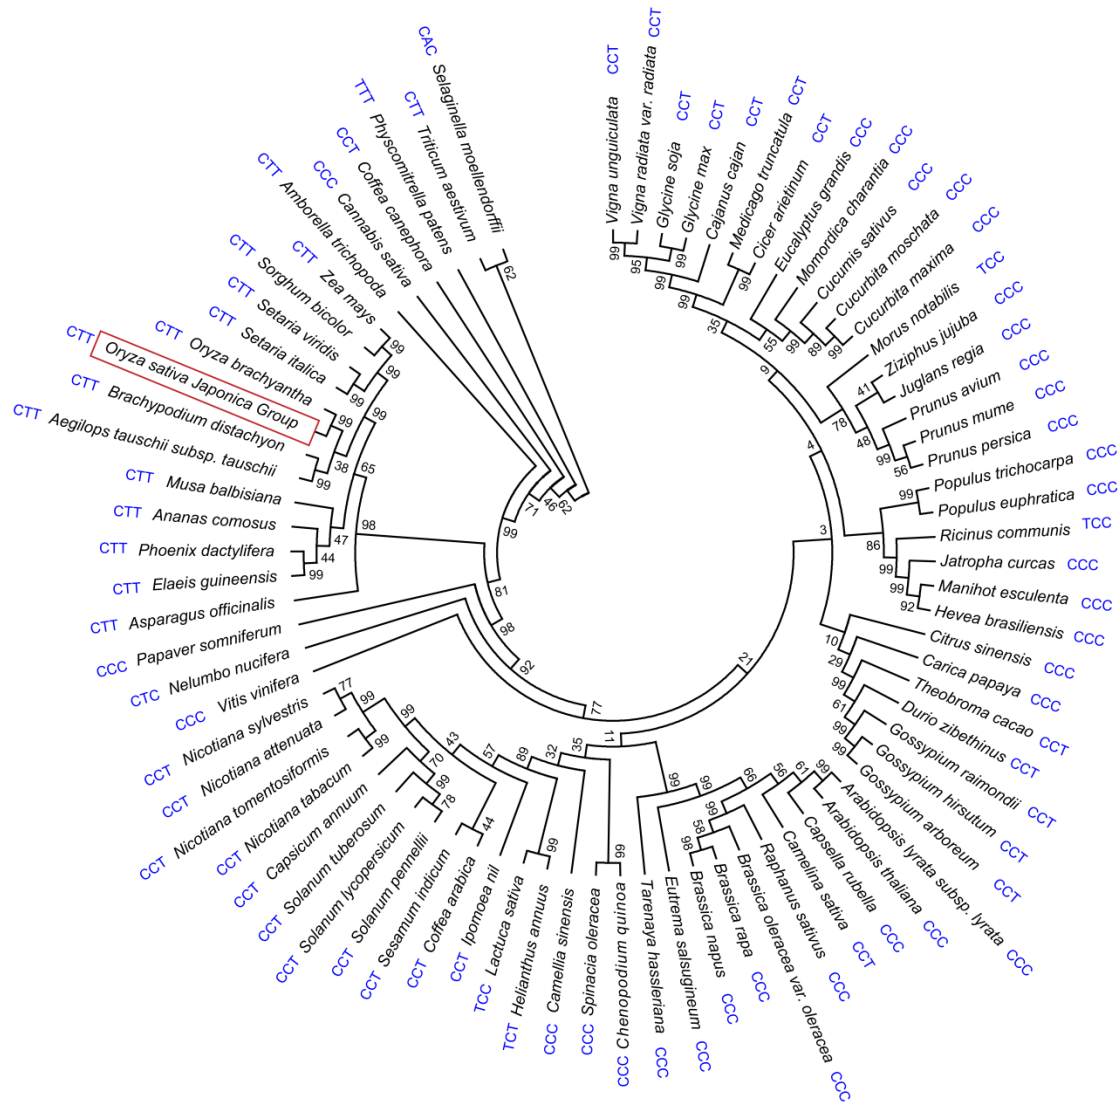

**Fig. S3** Phylogenetic analysis of OsPPR16 and the nucleotide positions corresponding to the editing sites *rpoB*-545, *ndhB*-746 and *ndhD*-887 in 79 land plants. All protein sequences were downloaded from NCBI, and the phylogenetic tree was constructed by the MEGA 5.0 software using the NJ method with 1000 bootstrap replicates. The nucleotides corresponding to the three editing sites *ropB*-545, *ndhB*-746, and *ndhD*-887 are given in blue. *Oryza sativa Japonica* group was highlighted in the red box.

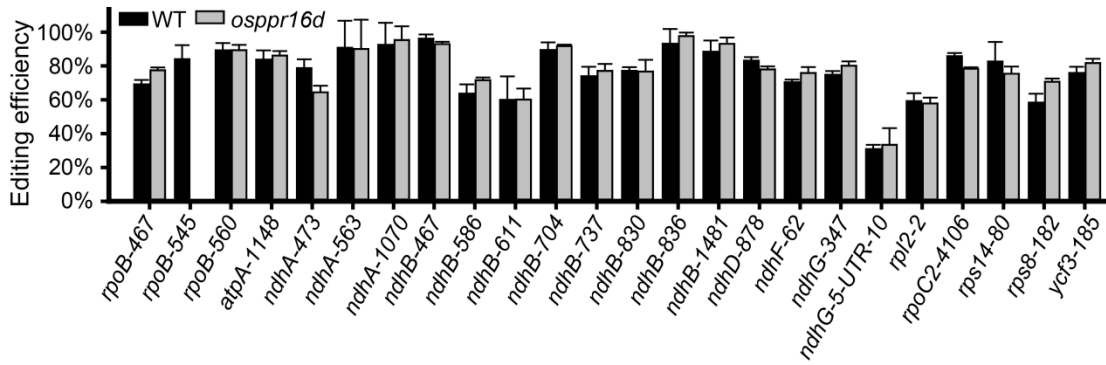

**Fig. S4** Editing efficiency of 24 plastid RNA editing sites in rice (*Oryza sativa*) WT and *osppr16d* mutant plants. Error bars indicate SD (n = 3).

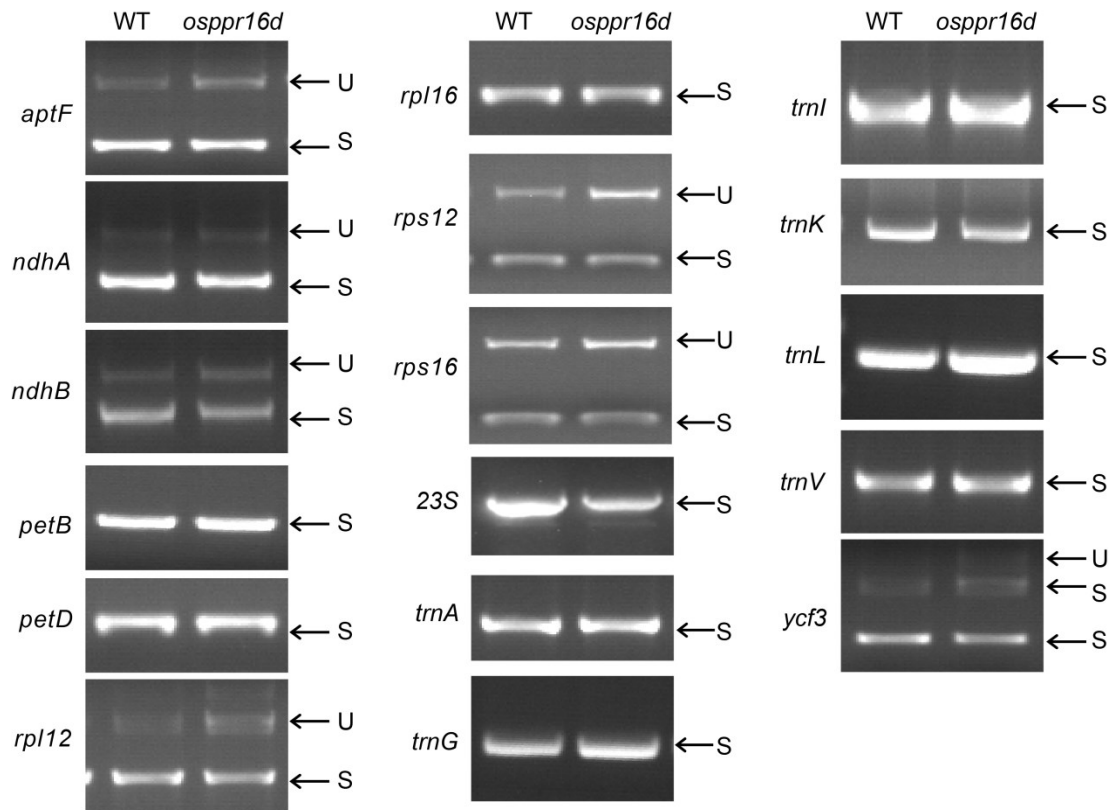

**Fig. S5** Splicing analyses of rice chloroplast transcripts in rice (*Oryza sativa*) WT and *osppr16d* mutant plants at the three-leaf stage. Splicing efficiency was comparatively assessed by RT-PCR. Transcripts are indicated at the left. Spliced (S) and unspliced (U) transcripts are marked at the right.

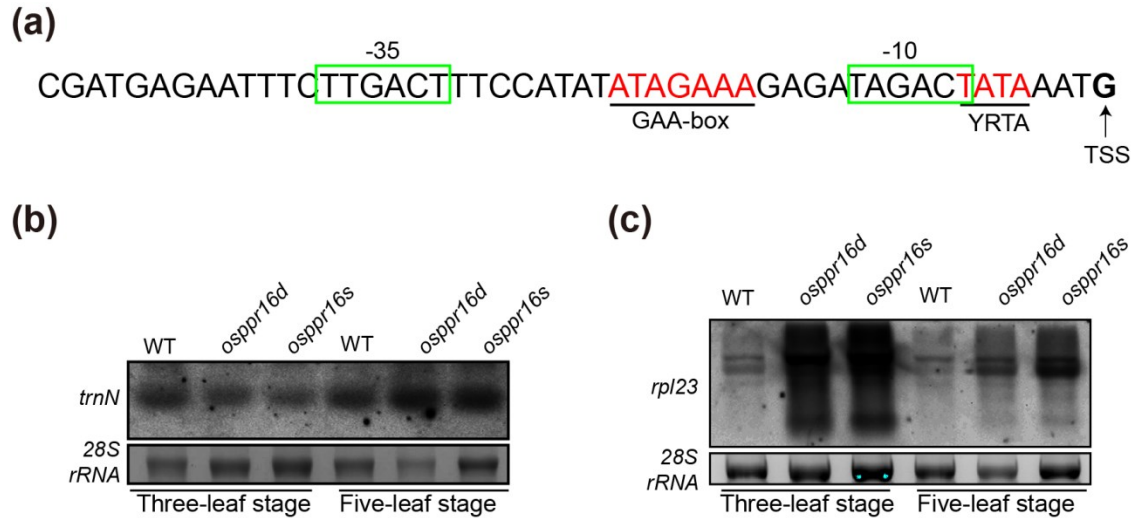

**Fig. S6** Expression of *trnN* and *rpl23* in rice (*Oryza sativa*) WT and *osppr16* mutant plants. (a) Motif analysis of the *trnN* promoter. The -35 and -10 boxes (in green box) are typical motifs of PEP promoters, the GAA and YRTA motifs (red text) are typical motifs of NEP promoters (Liere and Börner, 2007). TTS: transcription start site. (b, c) Northern blot analysis to determine accumulation of *trnN* (b) and *rpl23* (c) transcripts in *osppr16* mutants and WT plants at the three-leaf stage and the five-leaf stage. *28S rRNA* accumulation is shown as internal loading control.

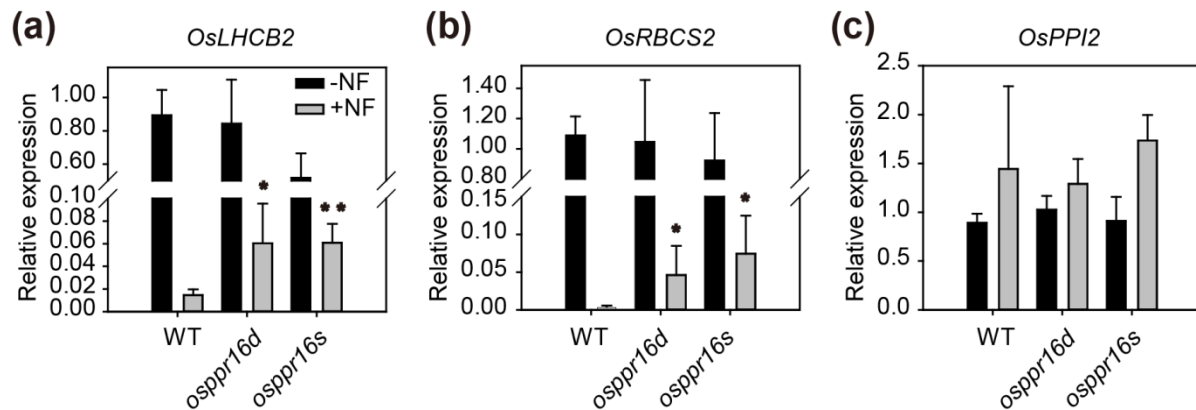

**Fig. S7** *osppr16* mutants show a *gun* phenotype in the presence of norflurazon (NF). (a-c) qRT-PCR analysis of the expression of *OsLHCB2* (a), *OsRBCS2* (b), and *OsPPI2* (c) in rice seedlings grown on half-strength MS medium under white light with or without 5  $\mu$ M NF for 7 d. *OsPPI2* was used as reference gene that is not controlled by retrograde signals. Error bars indicate the SD

(n = 2-4), \* indicates  $P < 0.05$ , \*\* indicates  $P < 0.01$ . The asterisks denote a significant difference to the WT in the same treatment (-NF or +NF; Student's *t*-test).

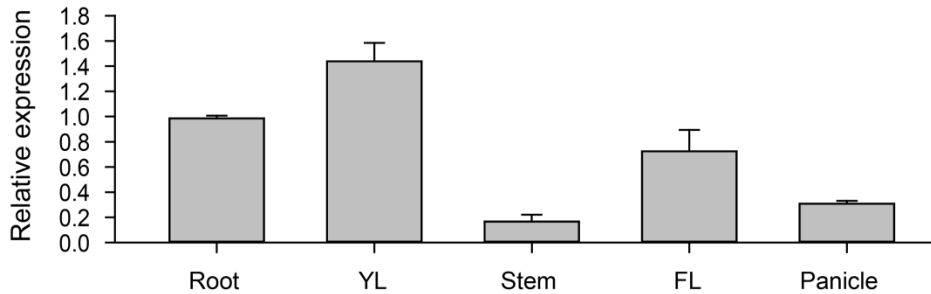

**Fig. S8** Tissue-specific expression profiles of *OsPPR16* in rice (*Oryza sativa*) plants. qRT-PCR was used to determine the expression levels of *OsPPR16* in different tissues. *OsTPI* was used as reference gene. The expression level of *OsPPR16* in roots was set as 1.0. YL: young leaves; FL: flag leaves. Error bars indicate SD (n = 3).

**Table S1** List of oligonucleotides used in this study.

| Primer    | Sequence (5'-3')                              | Application          |
|-----------|-----------------------------------------------|----------------------|
| Target1-F | GGCACGCGCGGAACGGCCTCGCC                       | Plasmid construction |
| Target1-R | AAACGGCGAGGCCGTTCCGCGCG                       | Plasmid construction |
| Target2-F | GCCGGCCGCGCGCTCCGACCTGC                       | Plasmid construction |
| Target2-R | AAACGCAGGTCGGAGCGCGCGGC                       | Plasmid construction |
| Target3-F | GCCGGATATTTTCAGATCCTCTGC                      | Plasmid construction |
| Target3-R | AAACGCAGAGGATCTGAAATATC                       | Plasmid construction |
| P1        | AGTGGCGGTTGCATGTAGAG                          | Genotype analysis    |
| P2        | ATCAAGACAGCCAAGCTCCC                          | Genotype analysis    |
| P3        | GGGAGCTTGGCTGTCTTGAT                          | Genotype analysis    |
| P4        | CGGCCAAGAAGATCCACCAT                          | Genotype analysis    |
| RNAi16-F  | ACTAGTGGTACCTTGCAAGGGTGAG<br>AACTGCT          | Plasmid construction |
| RNAi16-R  | GAGCTCGGATCCGAGCCCAAAGCA<br>ATGGCAA           | Plasmid construction |
| CO16A-F   | GCATTTCTTCTAGCTCAACCA                         | Plasmid construction |
| CO16A-R   | GTCGACTCAGCATGGTTCAAATCG<br>CA                | Plasmid construction |
| CO16B-F   | CATGATTACGAATTCGAGCTCAAAG<br>TAAAGTGCGGGGATCG | Plasmid construction |

|            |                                                                |                      |
|------------|----------------------------------------------------------------|----------------------|
| CO16B-R    | CTATGTAAATTATATTAGCTGAGCT<br>CTAGATTTAGAAGAAT                  | Plasmid construction |
| Cas9-F     | GCATGAAGAGGATCGAGGAG                                           | Genotype analysis    |
| Cas9-R     | GATCTCTTGCTCGGACTTGG                                           | Genotype analysis    |
| T-DNA16-F  | CTAGCCAATACGCAAACCGC                                           | Genotype analysis    |
| T-DNA16-R  | AAGGCCCTATTTGTCCCACG                                           | Genotype analysis    |
| Sbu16YPF-F | GGGGACAAGTTTGTACAAAAAAGC<br>AGGCTTCACCATGGTGTGCTCCGTG<br>GCTGC | Plasmid construction |
| Sbu16YPF-R | GGGGACCACTTTGTACAAGAAAGCT<br>GGGTGCCAGTAGTCTCCACATGAGC         | Plasmid construction |
| trnE-F     | CCCCTATCGTCTAGTGGTTCAG                                         | Northern blot        |
| trnE-R     | TACCCCCAGGGGAAGTCG                                             | Northern blot        |
| trnN-F     | TCCTCAGTAGCTCAGTGGTAGA                                         | Northern blot        |
| trnN-R     | GGATTTCGAACCTACGACCAGT                                         | Northern blot        |
| rpl23-F    | TGGATGGAATCAAATACGCAGT                                         | Northern blot        |
| rpl23-R    | GGGCCATTCTTCTACCCTT                                            | Northern blot        |
| atpF-F     | TTTTAGCTCACTGGCCATCC                                           | RNA splicing         |
| atpF-R     | TTCATCGCCCTTTGTTTTTC                                           | RNA splicing         |
| ndhA-F     | ATGATAATAGACAGGGTACAGG                                         | RNA splicing         |
| ndhA-R     | TTATAGTGAAACAAGTTGGGAAG                                        | RNA splicing         |
| ndhB-F     | ATGATCTGGCATGTACAGAATG                                         | RNA splicing         |
| ndhB-R     | CTAAAAGAGGGTATCCTGAGCA                                         | RNA splicing         |
| petB-F     | TTCTCATATACGGTTCTCGG                                           | RNA splicing         |
| petB-R     | TAAAGGGCCCGAAATACCTT                                           | RNA splicing         |
| petD-F     | ATGGGAGTAACAAAGAAACC                                           | RNA splicing         |
| petD-R     | TGTTGCTCCAATACCTAACC                                           | RNA splicing         |
| rpl2-F     | ACGGCGAAACATTTATACAA                                           | RNA splicing         |
| rpl2-R     | TTACTTACGGCGACGAAGAATA                                         | RNA splicing         |
| rpl16-F    | ATGCTTAGTCCCAAAGAAC                                            | RNA splicing         |
| rpl16-R    | AACCGAAGAAATTGACTTCG                                           | RNA splicing         |
| rps12-F    | ACTATCAACCCCAAAAACC                                            | RNA splicing         |
| rps12-R    | TTTGGCTTTTGTACCCCAT                                            | RNA splicing         |
| rps16-F    | AAAACGATGTGGTAGAAAGC                                           | RNA splicing         |
| rps16-R    | AGAATTCCGCCTTCCTTAAA                                           | RNA splicing         |
| trnA-F     | GGGGATATAGCTCAGTTGGT                                           | RNA splicing         |
| trnA-R     | TGGAGATAAGCGGACTCGAA                                           | RNA splicing         |
| trnG-F     | TCGTTAGCTTGGAAGGCTAG                                           | RNA splicing         |
| trnG-R     | GCGGGTATAGTTTAGTGGTA                                           | RNA splicing         |



|         |                          |              |
|---------|--------------------------|--------------|
| trnI-F  | TGGGCCATCCTGGACTTGA      | RNA splicing |
| trnI-R  | AGCTCAGTGGTAGAGCGCG      | RNA splicing |
| trnK-F  | GGTTGCCCGGGACTCGAA       | RNA splicing |
| trnK-R  | GGGTTGCTAACTCAATGGTAGAG  | RNA splicing |
| trnL-F  | GGATATGGCGAAATCGGTA      | RNA splicing |
| trnL-R  | TGGGGATAGAGGGACTTGA      | RNA splicing |
| trnV-F  | TAGGGCTATACGGATTCGAA     | RNA splicing |
| trnV-R  | AGGGCTATAGCTCAGTTCGG     | RNA splicing |
| ycf3-F  | ATGCCTAGATCCCGTATAAATG   | RNA splicing |
| ycf3-R  | TTATTCAAATTCAAAGCGCTTC   | RNA splicing |
| 23S-F   | TTCAAAGAGGAAAGGCTTG      | RNA splicing |
| 23S-R   | AGAGAGCACTCATCTTGGGG     | RNA splicing |
| atpA-F  | GTAGCTGAAATGGCGGATTC     | RNA editing  |
| atpA-R  | ATCTGCTCTTCCACTGGAAG     | RNA editing  |
| atpF-F  | CGTCCTATCTATAAGAGGAGAGC  | RNA editing  |
| atpF-R  | CATTCGATACTCATCCGCTTC    | RNA editing  |
| ndhA-F  | TGTTTGTTGACCCATGAACCC    | RNA editing  |
| ndhA-R  | TTTATGCAAGAGTGGAAGCCC    | RNA editing  |
| ndhB-1F | GGAAATAGCATGGAATAAGGTTTA | RNA editing  |
| ndhB-1R | TTCCTGGGGAGTTATACATTTGTG | RNA editing  |
| ndhB-2F | ATTTACTCATGGGTGGGGCA     | RNA editing  |
| ndhB-a  | TCCTTCGTAGACGTCAGGAG     | RNA editing  |
| ndhB-b  | CCCCTCCAGTCGTTGCTTT      | RNA editing  |
| ndhB-2R | ATTACCCTAGCGCCCATTC      | RNA editing  |
| ndhD-F  | CCGCAGCATGGCTCTATCTT     | RNA editing  |
| ndhD-R  | TCTATCACAAGCCGTTCCCG     | RNA editing  |
| ndhF-F  | GAATTAGTTTGGTGAATCGG     | RNA editing  |
| ndhF-R  | GGAAGTAGTAACCAATCCCAAC   | RNA editing  |
| ndhG-F  | CGAATACCTACTGCTTATTGC    | RNA editing  |
| ndhG-R  | TCGGTTGCTAAATGAATCCC     | RNA editing  |
| petB-F  | TGACGCGATTCCGTAATAG      | RNA editing  |
| petB-R  | GAAATACCACAACCTACCCG     | RNA editing  |
| psbE-F  | GTCAGTACGGGTTTAGCTTA     | RNA editing  |
| psbL-R  | CCAGTATAGACTGGTACGAT     | RNA editing  |
| rpl2-F  | GGTGTTAAGGTAGTAGCTGT     | RNA editing  |
| rpl2-R  | CCTCTATGCCTTGCGGTAATG    | RNA editing  |
| rpl20-F | ACCCATGAACCCAGTTACCA     | RNA editing  |
| rpl20-R | AATGGGAAAAAGGATGGCTAA    | RNA editing  |
| rpoA-F  | GAAAGAACAATGGGGAAGAAAA   | RNA editing  |
| rpoA-R  | AGATGCTTCTCTAGAGTGTC     | RNA editing  |
| rpoB-F  | GGATGCTGTGTATGAATCAC     | RNA editing  |

|          |                          |             |
|----------|--------------------------|-------------|
| rpoB-R   | CTTGGCTTGTTGTATCCGTC     | RNA editing |
| rpoC1-F  | ACGAGTACCTAATCACGAGG     | RNA editing |
| rpoC1-R  | TCCACAAGCACAAATTCTGC     | RNA editing |
| rpoC2-F  | GGCACCTTAGAGGAAGACTC     | RNA editing |
| rpoC2-R  | TACGACCTCGTAAGGCAGCT     | RNA editing |
| rps2-F   | CTCGGCAAAGCGTAAAGGTA     | RNA editing |
| rps2-R   | CTTCAAGATTGCCACATCTC     | RNA editing |
| rps8-F   | ACCTCTATAAGAAACGCGGACA   | RNA editing |
| rps8-R   | AGACTTCTCCCCCAATTCTGTT   | RNA editing |
| rps14-F  | CCATCTAGGATTAGAACCGT     | RNA editing |
| rps14-R  | ATCTTGTTGCACCCGGTAAC     | RNA editing |
| ycf3-F   | GGCTGAGCAGAAATACCTCT     | RNA editing |
| ycf3-R   | GTAATGACAGATCACGGCCA     | RNA editing |
| Real16-F | TGTCAAAGCACAGCTGCTCA     | qRT-PCR     |
| Real16-R | TGGATTGTTGTGCCAGGGG      | qRT-PCR     |
| atpA-F   | TCGCGGAGTTACAAGCCTTT     | qRT-PCR     |
| atpA-R   | ATTCTCGTAATCGTCGGCCC     | qRT-PCR     |
| atpB-F   | GGGGGAGCTGGAGTAGGTAA     | qRT-PCR     |
| atpB-R   | CCCCTACTCCGCCAAATACG     | qRT-PCR     |
| atpE-F   | ACTGACTCCTAAGCGAATT      | qRT-PCR     |
| atpE-R   | GGCGTGGTTTGGTAATAC       | qRT-PCR     |
| atpH-F   | CGTAGGTCTTGCTTCTAT       | qRT-PCR     |
| atpH-R   | GTCTCGCAATACCTTCTA       | qRT-PCR     |
| atpI-F   | ATTAGTCGTTGTTGTTCTTGT    | qRT-PCR     |
| atpI-R   | GCTTGAATACCGCTTGTA       | qRT-PCR     |
| petA-F   | GCAGTGCTTCCCGATACTGT     | qRT-PCR     |
| petA-R   | AGCACCCACATTCAACCCTC     | qRT-PCR     |
| petB-F   | ACGTGGAAGTGCTAGTGTGG     | qRT-PCR     |
| petB-R   | CGGCAGTAAGCAGAGGAAGT     | qRT-PCR     |
| petD-F   | CCGACGGGCTTATTGACAGT     | qRT-PCR     |
| petD-R   | GGTTGTAGCTACTGGGCGAC     | qRT-PCR     |
| petG-F   | TTTCTATTTGGAATCGTCTTAGG  | qRT-PCR     |
| petG-R   | ATCCCCACGTCTGTATTG       | qRT-PCR     |
| petL-F   | CTAGTTATTTGCGTTTTCTATTGG | qRT-PCR     |
| petL-R   | GACGTATCTTGTTCAAGCC      | qRT-PCR     |
| petN-F   | GGATATAGTAAGTCTCGCTTGG   | qRT-PCR     |
| petN-R   | CTAGAGTCCACTCCTCCC       | qRT-PCR     |
| psaA-F   | GCAGTCGGATGTTTGGGGTA     | qRT-PCR     |
| psaA-R   | GAAATCTCGGAGCCACCCAT     | qRT-PCR     |
| psaB-F   | ATGAACGGACACCTTTGGCT     | qRT-PCR     |
| psaB-R   | CCCACCAATCTTGCTTGAC      | qRT-PCR     |

|         |                               |         |
|---------|-------------------------------|---------|
| psaC-F  | ACCGAAGATTGTGTGGGTTGT         | qRT-PCR |
| psaC-R  | AAGATAGAGCCATGCTGCGG          | qRT-PCR |
| psaI-F  | AACTTACCCTCTATTTTCGTGCC       | qRT-PCR |
| psaI-R  | TGCACATAAAGAAATAAAGAAGCC<br>A | qRT-PCR |
| psaJ-F  | CATATCTCTCTGTAGCACCCGT        | qRT-PCR |
| psaJ-R  | GGGAATGACAAAGCATCTGGG         | qRT-PCR |
| psbA-F  | TGTGGCCGCTCATGGTTATT          | qRT-PCR |
| psbA-R  | CCCTACTACAGGCCAAGCAG          | qRT-PCR |
| psbB-F  | GTTGAACAAGTAGGCGTAA           | qRT-PCR |
| psbB-R  | ACAGTAGCAGGATCAGAATA          | qRT-PCR |
| psbC-F  | GCTCCTTTAGGCTCTTTA            | qRT-PCR |
| psbC-R  | GTCGCTAACCAACTTCTA            | qRT-PCR |
| psbD-F  | GGCCCAATCGCTGTTTTTGT          | qRT-PCR |
| psbD-R  | CCAAAACCTCGGCGCAAAGAA         | qRT-PCR |
| psbE-F  | CCCTATTCATTGCGGGTTGG          | qRT-PCR |
| psbE-R  | ACGGAATTCCTTGTCGGCTT          | qRT-PCR |
| psbF-F  | TTTTACAGTGCGATGGCTGG          | qRT-PCR |
| psbF-R  | CGTTGGATGAACTGCATTGCT         | qRT-PCR |
| psbI-F  | ACAGTAGTGATATTCTTTGTTTCCC     | qRT-PCR |
| psbI-R  | TCGTCACGCCCAGGATTA            | qRT-PCR |
| psbJ-F  | TGGCCGATACTACTGGAAGA          | qRT-PCR |
| psbJ-R  | CCCAATCCAGAATATGAACCGT        | qRT-PCR |
| psbK-F  | TTTCTTCGCCAAATTGCCCCG         | qRT-PCR |
| psbK-R  | CAGCTTGCCAAACAAAGGCT          | qRT-PCR |
| psbL-F  | ATGACACAATCAAACCCGAATG        | qRT-PCR |
| psbL-R  | ACAAAAATGAGTAATAAACCCAGT      | qRT-PCR |
| psbM-F  | ATATTCTCGCATTATTGCTACTG       | qRT-PCR |
| psbM-R  | AATCATTTTGGCTGACTGTTTT        | qRT-PCR |
| psbN-F  | GGAAACAGCAACTTTAGTCG          | qRT-PCR |
| psbN-R  | CGTGTCTTCGAATGGATCT           | qRT-PCR |
| psbZ-F  | GCTTCTCCTGATGGTTGGTCA         | qRT-PCR |
| psbZ-R  | AGCTACCAGAAAGACCAGTCC         | qRT-PCR |
| rbcL-F  | AGGGGAACGCGAAATGACTT          | qRT-PCR |
| rbcL-R  | AAAGATACCGCGAGCACGAT          | qRT-PCR |
| rpoA-F  | CCGCCTTCCGTAGAAATCGT          | qRT-PCR |
| rpoA-R  | CGCGATCTCTTTGATCCGT           | qRT-PCR |
| rpoB-F  | GGCAGAAGAAGTTGAGAA            | qRT-PCR |
| rpoB-R  | GGAAGAATAGGTGAGTGATT          | qRT-PCR |
| rpoC1-F | CGTGCTACTTCTAATGTT            | qRT-PCR |
| rpoC1-R | CCTGTATGCCTAATCTATG           | qRT-PCR |

|           |                          |         |
|-----------|--------------------------|---------|
| rpoC2-F   | GGCTGATGATGAGGTAAG       | qRT-PCR |
| rpoC2-R   | TGAAGAATAGAAGGATAGACAA   | qRT-PCR |
| ycf4-F    | ATTATATCTGTACTTCCATCTCA  | qRT-PCR |
| ycf4-R    | GTCATAACCACTGCCTAC       | qRT-PCR |
| HEMA1-F   | CGCTATTTCTGATGCTATGGGT   | qRT-PCR |
| HEMA1-R   | TCTTGGGTGATGATTGTTTGG    | qRT-PCR |
| CHLD-F    | GCTTGCAGAAAGCTACACAAGC   | qRT-PCR |
| CHLD-R    | AGGCCGTGAGCTAAAGGAGC     | qRT-PCR |
| YGL1-F    | ATGAACCTTACCGTCCTATTCCTT | qRT-PCR |
| YGL1-R    | GGACCCACCAACAGCAAGAT     | qRT-PCR |
| PORA-F    | TGTACTGGAGCTGGAACAACAA   | qRT-PCR |
| PORA-R    | GAGCACAGCAAATCCTAGACG    | qRT-PCR |
| CAO-F     | GATCCATACCCGATCGACAT     | qRT-PCR |
| CAO-R     | CGAGAGACATCCGGTAGAGC     | qRT-PCR |
| DVR-F     | CGAGCCCAGGTTTCATCAAGGTGC | qRT-PCR |
| DVR-R     | CCTCCCGATCTTGCCGA ACTCC  | qRT-PCR |
| OsLHCB2-F | TGTGTACACTTGTAGTAGCCAC   | qRT-PCR |
| OsLHCB2-R | CACACACACACACAATTAAGGT   | qRT-PCR |
| OsRBCS2-F | CATCTCAAGAAGTACTCGAGCA   | qRT-PCR |
| OsRBCS2-R | GAACTTCTTGATGCCCTCAATC   | qRT-PCR |
| OsPPI2-F  | AAGGTTCTGCTAGTGTTAGTCC   | qRT-PCR |
| OsPPI2-R  | GAATCATCAAGGACAATCTGCC   | qRT-PCR |

**Table S2** Accession numbers of RpoB, NdhB, NdhD, and homologous of OsPPR16 in 79 land plants.

| Organism                                        | OsPPR16            | RpoB               | NdhB               | NdhD               |
|-------------------------------------------------|--------------------|--------------------|--------------------|--------------------|
| <i>Aegilops tauschii</i> subsp. <i>tauschii</i> | XP_02018508<br>3.1 | YP_008474<br>290.1 | YP_0084743<br>44.1 | YP_0084743<br>53.1 |
| <i>Amborella trichopoda</i>                     | XP_01162433<br>7.1 | NP_904091<br>.2    | NP_904144.1        | NP_904149.1        |
| <i>Ananas comosus</i>                           | XP_02011448<br>6.1 | YP_009116<br>334.1 | YP_0091163<br>87.1 | YP_0091163<br>92.1 |
| <i>Arabidopsis lyrata</i> subsp. <i>lyrata</i>  | XP_00289263<br>5.1 | YP_009357<br>259.1 | YP_0093573<br>27.1 | YP_0093573<br>17.1 |
| <i>Arabidopsis thaliana</i>                     | NP_172596.1        | NP_051051<br>.1    | NP_051103.2        | NP_051109.2        |
| <i>Asparagus officinalis</i>                    | XP_02024133<br>3.1 | YP_009370<br>013.1 | YP_0093700<br>65.1 | YP_0093700<br>70.1 |
| <i>Brachypodium distachyon</i>                  | XP_01022811<br>2.1 | YP_002000<br>478.1 | YP_0020005<br>29.1 | YP_0020005<br>35.1 |

|                                        |                    |                    |                    |                    |
|----------------------------------------|--------------------|--------------------|--------------------|--------------------|
| <i>Brassica napus</i>                  | XP_02254704<br>6.1 | YP_005089<br>944.1 | YP_0050900<br>13.1 | YP_0050900<br>03.1 |
| <i>Brassica oleracea var. oleracea</i> | XP_01360425<br>1.1 | YP_009564<br>567.1 | YP_0095646<br>20.1 | YP_0095646<br>26.1 |
| <i>Brassica rapa</i>                   | XP_01850999<br>0.1 | YP_009553<br>759.1 | YP_0095538<br>12.1 | YP_0095538<br>18.1 |
| <i>Cajanus cajan</i>                   | XP_02022521<br>8.1 | YP_009309<br>154.1 | YP_0093091<br>98.1 | YP_0093092<br>08.1 |
| <i>Camelina sativa</i>                 | XP_01909894<br>4.1 | YP_009231<br>067.1 | YP_0092311<br>19.1 | YP_0092311<br>25.1 |
| <i>Camellia sinensis</i>               | XP_02808961<br>6.1 | YP_007317<br>240.1 | YP_0073173<br>09.1 | YP_0073172<br>99.1 |
| <i>Cannabis sativa</i>                 | XP_03048059<br>6.1 | YP_009123<br>065.1 | YP_0091231<br>16.1 | YP_0091231<br>22.1 |
| <i>Capsella rubella</i>                | XP_00630449<br>4.1 | YP_009161<br>913.1 | YP_0091619<br>65.1 | YP_0091619<br>70.1 |
| <i>Capsicum annuum</i>                 | XP_01656001<br>7.1 | YP_006666<br>022.1 | YP_0066660<br>75.1 | YP_0066660<br>80.1 |
| <i>Carica papaya</i>                   | XP_02190133<br>8.1 | YP_001671<br>675.1 | YP_0016717<br>27.1 | YP_0016717<br>32.1 |
| <i>Chenopodium quinoa</i>              | XP_02174522<br>1.1 | YP_009380<br>122.1 | YP_0093801<br>74.1 | YP_0093801<br>80.1 |
| <i>Cicer arietinum</i>                 | XP_00449978<br>2.1 | YP_002149<br>733.1 | YP_0021497<br>75.1 | YP_0021497<br>85.1 |
| <i>Citrus sinensis</i>                 | XP_00649462<br>9.1 | YP_740467<br>.1    | YP_740521.1        | YP_740527.1        |
| <i>Coffea arabica</i>                  | XP_02711431<br>2.1 | YP_817474<br>.1    | YP_817527.1        | YP_817532.1        |
| <i>Coffea canephora</i>                | CDP18169.1         | YP_009251<br>117.1 | YP_0092511<br>70.1 | YP_0092511<br>76.1 |
| <i>Cucumis sativus</i>                 | XP_00414712<br>6.2 | YP_247591<br>.1    | YP_247644.1        | YP_247650.1        |
| <i>Cucurbita maxima</i>                | XP_02296703<br>2.1 | YP_009447<br>442.1 | YP_0094474<br>95.1 | YP_0094475<br>01.1 |
| <i>Cucurbita moschata</i>              | XP_02294517<br>8.1 | YP_009447<br>527.1 | YP_0094475<br>97.1 | YP_0094475<br>86.1 |
| <i>Durio zibethinus</i>                | XP_02276569<br>7.1 | YP_009457<br>853.1 | YP_0094579<br>06.1 | YP_0094579<br>11.1 |
| <i>Elaeis guineensis</i>               | XP_01094079<br>0.1 | YP_006073<br>096.1 | YP_0060731<br>49.1 | YP_0060731<br>54.1 |
| <i>Eucalyptus grandis</i>              | XP_01006767<br>1.1 | YP_003933<br>954.1 | YP_0039340<br>03.1 | YP_0039340<br>08.1 |
| <i>Eutrema salsugineum</i>             | XP_00639371<br>7.1 | YP_009175<br>667.1 | YP_0091757<br>36.1 | YP_0091757<br>26.1 |
| <i>Glycine max</i>                     | XP_00352634<br>9.1 | YP_538763<br>.1    | YP_538808.1        | YP_538818.1        |

|                                    |                    |                    |                    |                    |
|------------------------------------|--------------------|--------------------|--------------------|--------------------|
| <i>Glycine soja</i>                | XP_02823833<br>5.1 | YP_008816<br>245.1 | YP_0088162<br>89.1 | YP_0088162<br>99.1 |
| <i>Gossypium arboreum</i>          | XP_01764351<br>3.1 | YP_005088<br>991.1 | YP_0050890<br>42.1 | YP_0050890<br>52.1 |
| <i>Gossypium hirsutum</i>          | XP_01674657<br>8.1 | YP_538927<br>.1    | YP_538980.1        | YP_538990.1        |
| <i>Gossypium raimondii</i>         | XP_01244936<br>3.1 | YP_005087<br>685.1 | YP_0050877<br>36.1 | YP_0050877<br>46.1 |
| <i>Helianthus annuus</i>           | XP_02197002<br>9.1 | YP_588104<br>.1    | YP_588162.1        | YP_588173.1        |
| <i>Hevea brasiliensis</i>          | XP_02163937<br>7.1 | YP_004327<br>649.1 | YP_0043277<br>21.1 | YP_0043277<br>11.1 |
| <i>Ipomoea nil</i>                 | XP_01917514<br>8.1 | YP_009295<br>096.1 | YP_0092951<br>48.1 | YP_0092951<br>57.1 |
| <i>Jatropha curcas</i>             | XP_01206874<br>0.1 | YP_002720<br>104.1 | YP_0027201<br>57.1 | YP_0027201<br>62.1 |
| <i>Juglans regia</i>               | XP_01884937<br>0.1 | YP_009186<br>160.1 | YP_0091862<br>28.1 | YP_0091862<br>18.1 |
| <i>Lactuca sativa</i>              | XP_02376860<br>2.1 | YP_398316<br>.1    | YP_398373.1        | YP_398378.2        |
| <i>Manihot esculenta</i>           | XP_02162810<br>8.1 | YP_001718<br>429.1 | YP_0017184<br>81.1 | YP_0017184<br>86.1 |
| <i>Medicago truncatula</i>         | XP_01345890<br>7.1 | YP_001381<br>728.1 | YP_0013816<br>86.1 | YP_0013816<br>74.1 |
| <i>Momordica charantia</i>         | XP_02213909<br>3.1 | YP_009456<br>053.1 | YP_0094561<br>05.1 | YP_0094561<br>12.1 |
| <i>Morus notabilis</i>             | XP_01009132<br>4.1 | YP_009139<br>671.1 | YP_0091397<br>23.1 | YP_0091397<br>28.1 |
| <i>Musa balbisiana</i>             | THU44351.1         | YP_009180<br>363.1 | YP_0091804<br>16.1 | YP_0091804<br>24.1 |
| <i>Nelumbo nucifera</i>            | XP_01024361<br>1.1 | YP_009093<br>942.1 | YP_0090939<br>94.1 | YP_0090939<br>99.1 |
| <i>Nicotiana attenuata</i>         | XP_01922418<br>3.1 | YP_009429<br>442.1 | YP_0094294<br>94.1 | YP_0094294<br>99.1 |
| <i>Nicotiana sylvestris</i>        | XP_00979958<br>3.1 | YP_358664<br>.1    | YP_358727.1        | YP_358737.1        |
| <i>Nicotiana tabacum</i>           | XP_01650596<br>1.1 | NP_054488<br>.1    | NP_054547.1        | NP_054557.2        |
| <i>Nicotiana tomentosiformis</i>   | XP_00963133<br>5.1 | YP_398851<br>.1    | YP_398913.1        | YP_398923.1        |
| <i>Oryza brachyantha</i>           | XP_00665315<br>5.1 | YP_009266<br>412.1 | YP_0092664<br>65.1 | YP_0092664<br>71.1 |
| <i>Oryza sativa Japonica Group</i> | XP_01564385<br>1.1 | NP_039373<br>.1    | NP_039432.1        | NP_039444.1        |
| <i>Papaver somniferum</i>          | XP_02642434<br>0.1 | YP_009234<br>974.1 | YP_0092350<br>27.1 | YP_0092350<br>32.1 |

|                                   |                    |                    |                    |                    |
|-----------------------------------|--------------------|--------------------|--------------------|--------------------|
| <i>Phoenix dactylifera</i>        | XP_02665606<br>5.1 | YP_003540<br>923.1 | YP_0035409<br>76.1 | YP_0035409<br>83.1 |
| <i>Physcomitrella patens</i>      | XP_02438979<br>4.1 | NP_904223<br>.1    | NP_904166.1        | NP_904238.1        |
| <i>Populus euphratica</i>         | XP_01102049<br>0.1 | YP_009054<br>421.1 | YP_0090544<br>73.1 | YP_0090544<br>78.1 |
| <i>Populus trichocarpa</i>        | XP_00230396<br>0.2 | YP_001109<br>491.1 | YP_0011095<br>48.1 | YP_0011095<br>57.2 |
| <i>Prunus avium</i>               | XP_02183293<br>9.1 | YP_009691<br>926.1 | YP_0096919<br>77.1 | YP_0096919<br>82.1 |
| <i>Prunus mume</i>                | XP_00823160<br>9.1 | YP_009020<br>030.1 | YP_0090200<br>83.1 | YP_0090200<br>88.1 |
| <i>Prunus persica</i>             | XP_00722025<br>5.1 | YP_004021<br>657.1 | YP_0040217<br>09.1 | YP_0040217<br>14.1 |
| <i>Raphanus sativus</i>           | XP_01843996<br>3.1 | YP_009046<br>906.1 | YP_0090469<br>59.1 | YP_0090469<br>65.1 |
| <i>Ricinus communis</i>           | XP_01557872<br>0.1 | YP_005090<br>170.1 | YP_0050902<br>22.1 | YP_0050902<br>28.1 |
| <i>Selaginella moellendorffii</i> | XP_02453738<br>9.1 | YP_003097<br>476.1 | YP_0030974<br>73.1 | YP_0030975<br>25.1 |
| <i>Sesamum indicum</i>            | XP_01110186<br>1.1 | YP_004935<br>658.1 | YP_0049357<br>12.1 | YP_0049357<br>17.1 |
| <i>Setaria italica</i>            | XP_01270061<br>3.1 | YP_008815<br>741.1 | YP_0088157<br>94.1 | YP_0088158<br>00.1 |
| <i>Setaria viridis</i>            | TKW19248.1         | YP_009172<br>130.1 | YP_0091721<br>83.1 | YP_0091721<br>90.1 |
| <i>Solanum lycopersicum</i>       | XP_00423381<br>2.1 | YP_008563<br>080.1 | YP_0085631<br>34.1 | YP_0085631<br>39.1 |
| <i>Solanum pennellii</i>          | XP_01506361<br>6.1 | YP_009421<br>349.1 | YP_0094214<br>03.1 | YP_0094214<br>08.1 |
| <i>Solanum tuberosum</i>          | XP_00634715<br>9.1 | YP_635631<br>.1    | YP_635684.1        | YP_635689.2        |
| <i>Sorghum bicolor</i>            | XP_02131854<br>0.1 | YP_899397<br>.1    | YP_899451.1        | YP_899457.1        |
| <i>Spinacia oleracea</i>          | XP_02183836<br>1.1 | NP_054924<br>.1    | NP_054977.1        | NP_054988.2        |
| <i>Tarenaya hassleriana</i>       | XP_01054019<br>4.1 | YP_009356<br>519.1 | YP_0093565<br>71.1 | YP_0093565<br>77.1 |
| <i>Theobroma cacao</i>            | XP_01798484<br>4.1 | YP_004021<br>309.1 | YP_0040213<br>59.1 | YP_0040213<br>69.1 |
| <i>Triticum aestivum</i>          | SPT16892.1         | NP_114249<br>.1    | NP_114301.1        | NP_114308.1        |
| <i>Vigna radiata var. radiata</i> | XP_01449960<br>0.1 | YP_003434<br>344.1 | YP_0034343<br>84.1 | YP_0034343<br>89.1 |
| <i>Vigna unguiculata</i>          | XP_02793995<br>1.1 | YP_006460<br>343.1 | YP_0064603<br>82.1 | YP_0064603<br>88.1 |

|                        |                    |                    |                    |                    |
|------------------------|--------------------|--------------------|--------------------|--------------------|
| <i>Vitis vinifera</i>  | XP_01907316<br>3.1 | YP_567068<br>.1    | YP_567123.1        | YP_567128.1        |
| <i>Zea mays</i>        | NP_00135656<br>9.1 | NP_043015<br>.1    | NP_043076.1        | NP_043087.1        |
| <i>Ziziphus jujuba</i> | XP_01587614<br>2.1 | YP_009256<br>319.1 | YP_0092563<br>72.1 | YP_0092563<br>77.1 |

**Table S3** Genotype and phenotype of T<sub>0</sub> transgenic plants.

| <b>Line</b>        | <b>Genotype</b>  | <b>Phenotype</b> |
|--------------------|------------------|------------------|
| <i>osppr16d-1</i>  | Biallelic mutant | Pale             |
| <i>osppr16d-2</i>  | Biallelic mutant | Pale             |
| <i>osppr16d-3</i>  | Biallelic mutant | Pale             |
| <i>osppr16d-4</i>  | Biallelic mutant | Pale             |
| <i>OsPPR16d-5</i>  | Wild-type        | Green            |
| <i>osppr16d-6</i>  | Biallelic mutant | Pale             |
| <i>OsPPR16d-7</i>  | Heterozygous     | Green            |
| <i>OsPPR16d-8</i>  | Heterozygous     | Green            |
| <i>OsPPR16d-9</i>  | Wild-type        | Green            |
| <i>osppr16d-10</i> | Biallelic mutant | Pale             |
| <i>OsPPR16d-11</i> | Heterozygous     | Green            |
| <i>OsPPR16d-12</i> | Wild-type        | Green            |
| <i>OsPPR16d-13</i> | Heterozygous     | Green            |
| <i>OsPPR16d-14</i> | Heterozygous     | Green            |
| <i>osppr16d-15</i> | Biallelic mutant | Pale             |
| <i>osppr16d-16</i> | Biallelic mutant | Pale             |
| <i>OsPPR16d-17</i> | Wild-type        | Green            |
| <i>OsPPR16d-18</i> | Heterozygous     | Green            |
| <i>OsPPR16d-19</i> | Heterozygous     | Green            |
| <i>OsPPR16d-20</i> | Wild-type        | Green            |
| <i>osppr16d-21</i> | Biallelic mutant | Pale             |
| <i>OsPPR16d-22</i> | Heterozygous     | Green            |
| <i>OsPPR16d-23</i> | Heterozygous     | Green            |
| <i>osppr16d-24</i> | Biallelic mutant | Pale             |
| <i>OsPPR16d-25</i> | Heterozygous     | Green            |
| <i>OsPPR16d-26</i> | Wild-type        | Green            |
| <i>OsPPR16d-27</i> | Heterozygous     | Green            |
| <i>OsPPR16d-28</i> | Wild-type        | Green            |
| <i>OsPPR16d-29</i> | Heterozygous     | Green            |
| <i>OsPPR16d-30</i> | Heterozygous     | Green            |



|                    |                  |       |
|--------------------|------------------|-------|
| <i>OsPPR16d-31</i> | Heterozygous     | Green |
| <i>OsPPR16d-32</i> | Heterozygous     | Green |
| <i>OsPPR16d-33</i> | Wild-type        | Green |
| <i>OsPPR16d-34</i> | Heterozygous     | Green |
| <i>OsPPR16d-35</i> | Heterozygous     | Green |
| <i>osppr16d-36</i> | Homozygous       | Pale  |
| <i>OsPPR16s-1</i>  | Wild-type        | Green |
| <i>OsPPR16s-2</i>  | Heterozygous     | Green |
| <i>OsPPR16s-3</i>  | Heterozygous     | Green |
| <i>osppr16s-4</i>  | Biallelic mutant | Pale  |
| <i>OsPPR16s-5</i>  | Wild-type        | Green |
| <i>OsPPR16s-6</i>  | Heterozygous     | Green |
| <i>osppr16s-7</i>  | Biallelic mutant | Pale  |
| <i>OsPPR16s-8</i>  | Heterozygous     | Green |
| <i>OsPPR16s-9</i>  | Heterozygous     | Green |
| <i>OsPPR16s-10</i> | Wild-type        | Green |
| <i>osppr16s-11</i> | Biallelic mutant | Pale  |
| <i>OsPPR16s-12</i> | Wild-type        | Green |
| <i>OsPPR16s-13</i> | Heterozygous     | Green |
| <i>osppr16s-14</i> | Biallelic mutant | Pale  |
| <i>OsPPR16s-15</i> | Heterozygous     | Green |
| <i>OsPPR16s-16</i> | Heterozygous     | Green |
| <i>osppr16s-17</i> | Homozygous       | Pale  |
| <i>OsPPR16s-18</i> | Wild-type        | Green |
| <i>OsPPR16s-19</i> | Heterozygous     | Green |
| <i>OsPPR16s-20</i> | Heterozygous     | Green |
| <i>OsPPR16s-21</i> | Wild-type        | Green |
| <i>OsPPR16s-22</i> | Heterozygous     | Green |
| <i>osppr16s-23</i> | Biallelic mutant | Pale  |
| <i>OsPPR16s-24</i> | Heterozygous     | Green |
| <i>OsPPR16s-25</i> | Heterozygous     | Green |
| <i>OsPPR16s-26</i> | Wild-type        | Green |
| <i>osppr16s-27</i> | Biallelic mutant | Pale  |
| <i>OsPPR16s-28</i> | Heterozygous     | Green |
| <i>OsPPR16s-29</i> | Heterozygous     | Green |
| <i>OsPPR16s-30</i> | Heterozygous     | Green |
| <i>osppr16s-31</i> | Biallelic mutant | Pale  |
| <i>OsPPR16s-32</i> | Heterozygous     | Green |
| <i>osppr16s-33</i> | Homozygous       | Pale  |

|                    |                  |      |
|--------------------|------------------|------|
| <i>osprr16s-34</i> | Biallelic mutant | Pale |
|--------------------|------------------|------|

### **Methods S1** Complementation of the *osprr16* mutant.

For mutant complementation, an 8300-bp WT genomic DNA fragment comprising the entire *OsPPR16* coding region, 4731 bp of the 5' upstream region and 1364 bp of 3' downstream sequence was cloned into the pCAMBIA2300 vector (CAMBIA, Canberra, Australia) in two steps. In the first step, a 5533 bp DNA fragment (3' portion of the 8300-bp fragment) was amplified with primers CO16A-F and CO16A-R, digested with *Sac* I and *Sal* I, and ligated into pCAMBIA2300 to generate pCAMBIA2300-OsPPR16A. In the second step, a 2767 bp DNA fragment (5' portion of the 8300-bp fragment) was amplified with primers CO16B-F and CO16B-R and subcloned into the pCAMBIA2300-OsPPR16A vector (digested with *Sac* I) by using the ClonExpress II One Step Cloning Kit (Vazyme, Nanjing, China). The pCAMBIA2300-OsPPR16 vector was transformed into callus tissue induced from mature seeds of line *osprr16d-36-6*, which was free of the CRISPR/Cas9 construct. The sequences of all primers are listed in Table S1.

### **Reference**

**Liere K, Börner T 2007.** Transcription and transcriptional regulation in plastids. *Cell and molecular biology of plastids*: Springer, 121-174.
